1  
2  
3  
4  
5  
6  
7  
8  
9  
10  
11  
12  
13  
14  
15  
16  
17  
18  
19  
20  
21  
22  
23  
24  
25  
26  
27  
28  
29  
30  
31  
32  
33  
34  
35  
36

**PUMILIO, but not RBMX, binding is required for regulation of genomic stability by noncoding RNA *NORAD***

Mahmoud M. Elguindy<sup>1,2</sup>, Florian Kopp<sup>1</sup>, Mohammad Goodarzi<sup>3</sup>, Frederick Rehfeld<sup>1</sup>, Anu Thomas<sup>1</sup>, Tsung-Cheng Chang<sup>1</sup>, Joshua T. Mendell<sup>1,4,5,6\*</sup>

<sup>1</sup>Department of Molecular Biology, University of Texas Southwestern Medical Center, Dallas, TX 75390, USA

<sup>2</sup>Medical Scientist Training Program, University of Texas Southwestern Medical Center, Dallas, TX 75390, USA

<sup>3</sup>Department of Biochemistry, University of Texas Southwestern Medical Center, Dallas, TX 75390, USA

<sup>4</sup>Harold C. Simmons Comprehensive Cancer Center, University of Texas Southwestern Medical Center, Dallas TX 75390, USA

<sup>5</sup>Hamon Center for Regenerative Science and Medicine, University of Texas Southwestern Medical Center, Dallas TX 75390, USA

<sup>6</sup>Howard Hughes Medical Institute, University of Texas Southwestern Medical Center, Dallas, TX 75390, USA

\* Correspondence: [Joshua.Mendell@UTSouthwestern.edu](mailto:Joshua.Mendell@UTSouthwestern.edu)

37 **ABSTRACT**

38 *NORAD* is a highly-conserved and abundant long noncoding RNA (lncRNA) that is required for  
39 maintenance of genomic stability in mammals. Although initial characterization of *NORAD*  
40 established it as a negative regulator of PUMILIO (PUM) proteins in the cytoplasm, a nuclear  
41 role for *NORAD* in genome maintenance through an interaction with the RNA binding protein  
42 RBMX has also been reported. Here we addressed the relative contributions of *NORAD*:PUM  
43 and *NORAD*:RBMX interactions to the regulation of genomic stability by this lncRNA. Extensive  
44 RNA FISH and fractionation experiments established that *NORAD* localizes predominantly to  
45 the cytoplasm with or without DNA damage. Moreover, genetic rescue experiments  
46 demonstrated that PUM binding is required for maintenance of genomic stability by *NORAD*  
47 whereas binding of RBMX is dispensable for this function. These data therefore establish an  
48 essential role for the *NORAD*:PUM interaction in genome maintenance and provide a foundation  
49 for further mechanistic dissection of this pathway.

## 50 INTRODUCTION

51 Long noncoding RNAs (lncRNAs) have emerged as important regulators of diverse biological  
52 processes. Among these transcripts, *Noncoding RNA activated by DNA damage (NORAD)* is  
53 particularly noteworthy, due to its unusually abundant expression in mammalian cells and  
54 tissues and strong evolutionary conservation across mammalian species. Initial studies of  
55 *NORAD* revealed that this lncRNA is required to maintain genomic stability in mammalian cells  
56 (Lee et al., 2016), and provided strong evidence that this function is mediated through the ability  
57 of *NORAD* to bind to and negatively regulate PUMILIO RNA binding proteins (PUM1 and  
58 PUM2) in the cytoplasm (Lee et al., 2016; Tichon et al., 2016). PUM proteins bind with high  
59 specificity to the 8 nucleotide (nt) PUMILIO response element (PRE) (UGUANAUA or  
60 UGUANAUN) on target messenger RNAs (mRNAs), triggering their deadenylation, decapping,  
61 and eventual degradation (Miller and Olivas, 2011; Quenault et al., 2011). Notably, *NORAD*  
62 contains approximately 18 conserved PREs and has the capacity to bind a large fraction of  
63 PUM1/2 within the cell, thereby limiting the availability of these proteins to repress target  
64 mRNAs. Consequently, loss of *NORAD* results in PUM hyperactivity and increased repression  
65 of PUM targets that include important regulators of mitosis, DNA repair, and DNA replication,  
66 resulting in a dramatic genomic instability phenotype in *NORAD*-deficient cells and mouse  
67 tissues (Kopp et al., 2019; Lee et al., 2016). Accordingly, PUM1/2 overexpression is sufficient to  
68 phenocopy loss of *NORAD* in both human cells and mice (Kopp et al., 2019; Lee et al., 2016),  
69 while PUM1/2 loss-of-function suppresses the genomic instability phenotype in *NORAD*  
70 knockout cells (Lee et al., 2016).

71

72 Recently, an alternative mechanism for the regulation of genomic stability by *NORAD* was  
73 proposed (Munschauer et al., 2018). Proteomic analysis of the *NORAD* interactome revealed an  
74 interaction with RBMX, an RNA binding protein that contributes to the DNA damage response

75 (Adamson et al., 2012). Subsequent experiments suggested that the *NORAD*:RBMX interaction  
76 facilitates the assembly of a ribonucleoprotein (RNP) complex in the nucleus that includes  
77 Topoisomerase I (TOP1) and other proteins that are critical for genome maintenance.  
78 Importantly, PUM and RBMX interact with different sites on *NORAD* and function in distinct  
79 subcellular compartments. Thus, while it remains to be determined whether the *NORAD*:RBMX  
80 interaction is necessary for regulation of genomic stability, both PUM and RBMX may play  
81 important, non-mutually exclusive roles in the genome maintenance functions of *NORAD*.

82

83 Here we further examined the mechanism by which *NORAD* functions to maintain genome  
84 stability in human cells and directly tested the requirement for PUM and RBMX interactions in  
85 this activity. RNA fluorescent in situ hybridization (FISH) using a panel of probes spanning the  
86 entire length of *NORAD*, as well as cellular fractionation studies, definitively demonstrated that  
87 this lncRNA localizes predominantly to the cytoplasm and does not traffic to the nucleus upon  
88 induction of DNA damage. Genetic rescue experiments in *NORAD* knockdown cells established  
89 that PUM binding is essential for maintenance of genomic stability whereas interaction with  
90 RBMX is completely dispensable for this function. Further experiments demonstrated that  
91 RBMX is not required for induction of *NORAD* following DNA damage nor its cytoplasmic  
92 localization. Together, these studies establish the importance of the *NORAD*:PUM axis in  
93 regulating genomic stability in mammalian cells and provide a foundation for further dissection  
94 of the mechanism and physiologic role of this pathway.

95

## 96 **RESULTS AND DISCUSSION**

### 97 ***NORAD* localizes predominantly to the cytoplasm with or without DNA damage**

98 Initial studies of *NORAD* reported a predominantly cytoplasmic localization of this lncRNA in  
99 human cell lines, based on RNA FISH using pools of fluorescently-labeled oligonucleotide

100 probes and subcellular fractionation experiments (Lee et al., 2016; Tichon et al., 2016).  
101 Recently, however, a distinct localization pattern was reported based upon RNA FISH  
102 performed using a commercially-available kit with a proprietary set of oligonucleotide probes  
103 that hybridize to an unknown segment of *NORAD* (Munschauer et al., 2018). In these more  
104 recent experiments, *NORAD* was reported to localize equally between the nucleus and  
105 cytoplasm and appeared to redistribute almost entirely to the nuclear compartment upon  
106 treatment of cells with the DNA damaging agents camptothecin and doxorubicin. Importantly, a  
107 common cell line (human colon cancer cell line HCT116) was used in the different studies,  
108 arguing against a cell-type specific difference in *NORAD* trafficking as the cause of these  
109 discordant results.

110

111 We considered the possibility that the disparate observed localization patterns could be due to  
112 unrecognized processing of the *NORAD* transcript, such that different segments of the RNA that  
113 are recognized by the different FISH probes accumulate in distinct subcellular compartments.  
114 To investigate this possibility, and to reliably establish the localization of the entire *NORAD*  
115 transcript, we generated a panel of 11 *in vitro* transcribed RNA FISH probes spanning the  
116 complete *NORAD* sequence (**Figure 1A**) (Mito et al., 2016). One probe, that recognized a  
117 segment of *NORAD* containing an Alu repeat element (probe 7), gave rise to a nonspecific  
118 nuclear signal that was present in both *NORAD*<sup>+/+</sup> and *NORAD*<sup>-/-</sup> HCT116 cells. The remaining  
119 10 probes produced a highly consistent, predominantly cytoplasmic, punctate localization  
120 pattern in wild-type cells that was absent in *NORAD*<sup>-/-</sup> cells (**Figure 1A-B**). These results were  
121 confirmed using subcellular fractionation followed by quantitative reverse transcriptase-PCR  
122 (qRT-PCR) using primers located at the 3' or 5' ends of *NORAD*, which revealed that 80-90% of  
123 the transcript is localized to the cytoplasmic compartment (**Figure 1C**).

124

125 Next, we examined *NORAD* localization following treatment of cells with agents that induce  
126 DNA damage. RNA FISH using the panel of probes spanning *NORAD* revealed clear  
127 cytoplasmic localization after treatment with doxorubicin or camptothecin, without a significant  
128 increase in nuclear signal compared to untreated cells (**Figure 2A-B**). Consistent with the  
129 previously reported induction of *NORAD* after DNA damage (Lee et al., 2016), a clear increase  
130 in cytoplasmic *NORAD* signal was apparent in treated cells (**Figure 2B**). These findings were  
131 further corroborated by subcellular fractionation experiments following treatment with DNA  
132 damaging agents, which confirmed that *NORAD* remained predominantly in the cytoplasmic  
133 compartment at all time points (**Figure 2C and Figure 2 – figure supplement 1A**).

134 Interestingly, we observed a modest increase in nuclear *NORAD* levels that peaked after 12  
135 hours of camptothecin or doxorubicin treatment. We speculated that this might represent a burst  
136 of *NORAD* transcription in response to accumulating DNA damage. To test this hypothesis, we  
137 co-treated cells with DNA damaging agents and the transcriptional inhibitor actinomycin D. As  
138 expected, this completely abrogated any detectable increase in nuclear *NORAD* abundance in  
139 treated cells (**Figure 2D and Figure 2 – figure supplement 1B**).

140

141 These comprehensive RNA FISH and subcellular fractionation experiments provide definitive  
142 evidence that *NORAD* is a cytoplasmic RNA in HCT116 cells and does not redistribute to the  
143 nucleus upon DNA damage. These findings are consistent with the reported localization of  
144 *NORAD* in other human and mouse cell lines (Kopp et al., 2019; Lee et al., 2016; Tichon et al.,  
145 2016). We conclude that the disparate localization pattern observed using a commercially-  
146 available RNA FISH probe set (Munschauer et al., 2018) most likely represented a non-specific  
147 signal.

148

149 **PUM1, PUM2, and RBMX are components of the *NORAD* interactome**

150 Previous crosslinking-immunoprecipitation coupled with high throughput sequencing (CLIP-seq)  
151 studies demonstrated that *NORAD* is the preferred binding partner of PUM2 in both human cells  
152 (Lee et al., 2016) and mouse brain (Kopp et al., 2019). In light of these findings, it was  
153 surprising that PUM1/2 were not reported among the most enriched *NORAD*-bound proteins in  
154 the recent RNA antisense purification with quantitative mass spectrometry (RAP-MS)  
155 experiments that identified the *NORAD*:RBMX interaction (Munschauer et al., 2018). Since  
156 these RAP-MS experiments utilized pulse labeling with 4-thiouridine to crosslink *NORAD* to  
157 protein interactors, a bias towards detection of proteins that bind to newly synthesized *NORAD*  
158 would be expected, likely explaining the enrichment of nuclear interactors observed.  
159 Nevertheless, we reanalyzed the published RAP-MS dataset to determine whether PUM1 or  
160 PUM2 were enriched in *NORAD* pull-downs compared to control *RMRP* pull-downs. Peptides  
161 were identified and scored using a combined algorithm that employed three search engines  
162 (Sequest HT, Mascot, and MS Amanda). Isoforms of PUM1 and PUM2, along with RBMX, were  
163 indeed identified as significantly-enriched interacting partners of *NORAD* compared to *RMRP*  
164 (**Figure 3 – figure supplement 1**). Notably, PUM1 was more enriched than PUM2 in our  
165 analysis, which may reflect its higher abundance in HCT116 cells (Lee et al., 2016). These  
166 results confirmed that both PUM proteins and RBMX are identified by RAP-MS as significant  
167 *NORAD*-interacting partners.

168

### 169 **Binding of PUMILIO, but not RBMX, to *NORAD* is necessary for genome stability**

170 Genetic epistasis experiments have strongly implicated a role for PUM1/2 in the regulation of  
171 genomic stability by *NORAD*, with PUM2 overexpression phenocopying, and PUM1/2  
172 knockdown suppressing, the effects of *NORAD* deletion (Kopp et al., 2019; Lee et al., 2016).  
173 Nevertheless, it has not yet been directly tested whether binding of PUM1/2 is required for  
174 *NORAD* function. Similarly, a requirement for RBMX binding in genome maintenance by

175 *NORAD* has not been established. Therefore, to directly interrogate the importance of PUM and  
176 RBMX binding for *NORAD* function, we generated a series of mutant *NORAD* constructs lacking  
177 either PUM or RBMX binding sites (**Figure 3A**). For each of the 18 PREs within *NORAD*, the  
178 UGU sequence, which is essential for PUM binding (Bohn et al., 2018; Van Etten et al., 2012),  
179 was mutated to ACA to abolish PUM interaction (PREmut construct). To remove the RBMX  
180 binding site, the first 898 nucleotides (nt) of *NORAD* were deleted (Munschauer et al., 2018) (5'  
181 deletion construct). We also sought to determine whether PUM or RBMX binding regions of  
182 *NORAD* could represent minimal functional domains that are sufficient for maintaining genomic  
183 stability. To this end, we generated a fragment comprising *NORAD* domain 4 (ND4), which  
184 represents the most conserved of five repeated segments within this lncRNA termed *NORAD*  
185 domains (Lee et al., 2016) and contains 4 PREs (nt 2494-3156). An RBMX binding site  
186 fragment, representing the 5' end of *NORAD* (nt 33-898) was also generated (5' fragment).  
187  
188 Wild-type or mutant *NORAD* constructs, as well as a control GFP sequence, under the control  
189 of a constitutive promoter were introduced into the *AAVS1/PPP1R12C* locus of HCT116 cells  
190 using a previously published TALEN pair (Sanjana et al., 2012) (**Figure 3B**). Endogenous  
191 *NORAD* was then depleted using CRISPR interference (CRISPRi) with a single-guide RNA  
192 (sgRNA) targeting the endogenous *NORAD* promoter. *NORAD* transcripts produced from the  
193 *AAVS1* locus were expressed at near physiologic levels in this system.  
194  
195 We next used UV crosslinking and RNA immunoprecipitation (RIP) to assess binding of wild-  
196 type and mutant *NORAD* transcripts to endogenous PUM1, PUM2, and RBMX. Pull-downs of  
197 each of these proteins resulted in the expected enrichment of wild-type *NORAD*, but not  
198 *GAPDH*, relative to immunoprecipitation with control IgG (**Figure 4A and Figure 4 – figure**  
199 **supplement 1A**). The PREmut transcript as well as the 5' fragment did not bind to PUM1/2 but



200 were recovered in RBMX RIP samples as efficiently as wild-type *NORAD*. In contrast, the 5'  
201 deletion construct and ND4 fragment retained PUM1 and PUM2 binding activity, but interaction  
202 with RBMX was abolished. Furthermore, RNA FISH documented a predominantly cytoplasmic  
203 localization pattern of each construct (**Figure 4B**).

204

205 Genome stability was assessed in cell populations expressing wild-type or mutant *NORAD*  
206 constructs by quantifying the number of aneuploid cells in each cell population using DNA FISH  
207 for marker chromosomes 7 and 20, as described previously (Lee et al., 2016). Knockdown of  
208 endogenous *NORAD* in GFP-control cells resulted in a significant accumulation of aneuploid  
209 cells (**Figure 4C**). The frequency of aneuploidy observed under these conditions was very  
210 similar to that observed previously in *NORAD*<sup>-/-</sup> HCT116 cells (Lee et al., 2016). Expression of  
211 wild-type *NORAD* in this system was sufficient to fully suppress the accumulation of aneuploid  
212 cells. Cells expressing the PREmut transcript, however, exhibited high levels of aneuploidy,  
213 demonstrating that loss of PUM binding abrogated the ability of *NORAD* to maintain genomic  
214 stability. Furthermore, the 5' deletion construct that lacks the RBMX binding site, but preserves  
215 the PUM interaction, was fully functional in this assay and completely prevented the  
216 accumulation of aneuploid cells. Thus, RBMX binding to *NORAD* is dispensable for genome  
217 maintenance. Remarkably, we observed a strong suppression of aneuploidy in cells expressing  
218 the minimal ND4 fragment, further supporting the centrality of the PUM interaction for *NORAD*  
219 function, while the 5' fragment of *NORAD* had no activity in this assay. Overall, these data  
220 provide compelling evidence that PUM, but not RBMX, binding to *NORAD* is necessary for the  
221 maintenance of genomic stability by this lncRNA.

222

223 **RBMX is not required for *NORAD* expression or localization**

224 Although RBMX is not required for maintenance of genomic stability by *NORAD*, we were able  
225 to confirm binding of this protein to the 5' end of *NORAD*, as reported (Munschauer et al., 2018)  
226 (**Figure 3 and Figure 4A**). Thus, we investigated whether RBMX functions as an upstream  
227 regulator of *NORAD* expression or localization. Depletion of RBMX using CRISPRi resulted in  
228 an increase in *NORAD* expression that was further augmented by doxorubicin treatment  
229 (**Figure 5A**). We speculate that this increase in *NORAD* levels may be an indirect effect of the  
230 previously reported accumulation of DNA damage caused by RBMX loss of function (Adamson  
231 et al., 2012). Additionally, RBMX knockdown did not alter the predominantly cytoplasmic  
232 localization of *NORAD*, as indicated by subcellular fractionation experiments (**Figure 5B**). We  
233 conclude that RBMX is not an essential co-factor for *NORAD* expression or localization.

234

235 In sum, these results establish the essential role of PUM binding for the regulation of genomic  
236 stability by *NORAD*. A systematic examination of the subcellular localization of this lncRNA  
237 unequivocally established its predominantly cytoplasmic localization under baseline conditions  
238 as well as after treatment with DNA-damaging agents. Moreover, genetic complementation  
239 experiments demonstrated that PUM binding is essential, whereas RBMX interaction is  
240 dispensable, for the genome maintenance function of *NORAD*. These results further define and  
241 clarify the *NORAD* molecular mechanism of action and direct future investigation towards  
242 elucidation of the regulation and physiologic roles of the *NORAD*:PUM axis.

243

244

245 **METHODS**

246 **Cell culture and generation of HCT116 CRISPRi cell line**

247 HCT116 cells (ATCC) were cultured in McCoy's 5a media (Thermo Fisher Scientific)  
248 supplemented with 10% FBS (Gibco, Sigma-Aldrich) and 1X AA (Gibco). All cell lines were  
249 confirmed to be free of mycoplasma contamination. HCT116 *NORAD*<sup>-/-</sup> cells were generated  
250 previously (Lee et al., 2016).

251

252 To generate the HCT116 CRISPRi cell line, lentivirus expressing dCas9/BFP/KRAB was  
253 produced by first seeding 6 × 10<sup>5</sup> HEK293T cells per well in a six-well plate. The following day,  
254 cells were transfected with 1.4 µg of pHR-SFFV-dCas9-BFP-KRAB (Addgene plasmid #46911),  
255 0.84 µg of psPAX2 (Addgene plasmid #12260), 0.56 µg of pMD2.G (Addgene plasmid #12259),  
256 8.4 µl of FuGENE HD (Promega), and 165 µl Opti-MEM (Thermo Fisher) according to the  
257 manufacturer's instructions. Medium was changed the next day. Two days after transfection,  
258 medium was collected and passed through a 0.45 µm SFCA sterile filter. Recipient HCT116  
259 cells were transduced overnight using medium supplemented with 8 µg/ml polybrene (EMD  
260 Millipore). Cells expressing BFP were enriched by FACS and single-cell clonal lines were  
261 derived.

262

263 **RNA Fluorescent *in situ* hybridization (RNA FISH)**

264 RNA FISH was performed as described previously (Mito et al., 2016) with the following  
265 modifications. DIG-labeled RNA probes for human *NORAD* were synthesized by *in vitro*  
266 transcription using a DIG-labeling mix (Roche). Primers used for amplification of the DNA  
267 template for each probe are provided in Supplementary File 1. 2 × 10<sup>5</sup> cells were grown on poly-  
268 L-lysine coated coverslips for 24 to 36 hours. For RNA FISH experiments with DNA damage  
269 treatment, cells were grown for 24 hours and treated with either 1 µM doxorubicin or 200 nM

270 camptothecin for an additional 12 hours. Samples were rinsed twice in phosphate buffer saline  
271 (PBS), fixed in 4% paraformaldehyde for 10 minutes, washed again in PBS, and permeabilized  
272 in 0.5% Triton X-100 for 10 minutes. Samples were then washed twice with PBS and rinsed with  
273 DEPC-treated water prior to incubation in prehybridization buffer (50% formamide, 2X SSC, 1X  
274 Denhardt's solution, 10 mM EDTA, 0.1 mg/ml yeast tRNA, 0.01% Tween-20) for 1 hour. 10 ng/ $\mu$ l  
275 DIG-labeled RNA probe was diluted in hybridization buffer (prehybridization buffer with 5%  
276 dextran sulfate) and used for hybridization at 55°C for 16 to 20 hours. Following hybridization,  
277 samples were washed, treated with RNase A, and blocked using Blocking Reagent (Roche).  
278 DIG-labeled probes were detected using mouse monoclonal anti-DIG primary antibody (Roche;  
279 1:100 dilution) and a Cy3-labeled goat anti-mouse IgG secondary antibody (Roche; 1:100  
280 dilution). Samples were mounted using SlowFade Diamond Antifade with DAPI mounting media  
281 (Invitrogen) and imaging was performed using a Zeiss LSM700 confocal microscope. ImageJ  
282 was used for further image analysis.

283

#### 284 **Subcellular fractionation**

285 Cells were seeded in triplicate and  $1 \times 10^6$  cells were collected for subcellular fractionation,  
286 which was performed as previously described (Kopp et al., 2019; Lee et al., 2016). Briefly, cell  
287 pellets were lysed in RLN1 buffer (50 mM Tris-HCl pH 8.0, 140 mM NaCl, 1.5 mM MgCl<sub>2</sub>, 0.5%  
288 NP-40, RNase inhibitor) on ice for 5 minutes and centrifuged at 500g x 2 min. The supernatant  
289 containing the cytoplasmic fraction was separated from the pelleted nuclear fraction. RNA was  
290 then isolated from both fractions using the Qiagen RNeasy kit and equal cell equivalents of  
291 nuclear and cytoplasmic RNA were used in subsequent qRT-PCR reactions. All samples were  
292 tested for *NORAD* as well as *NEAT1* (nuclear control) and *GAPDH* (cytoplasmic control). The  
293 sum of the nuclear and cytoplasmic expression level of each transcript was set to 100%, and  
294 the percentage of each transcript localized to each compartment was determined. *NEAT1* and

295 *GAPDH*, respectively, showed the expected nuclear and cytoplasmic localization in each  
296 experiment, confirming successful fractionation.

297

### 298 **Reanalysis of *NORAD* RAP-MS data**

299 The raw mass spectra files from iTRAQ-labeled *NORAD* and *RMRP* RAP-MS experiments  
300 (Munschauer et al., 2018) were downloaded from Massive (<https://massive.ucsd.edu>) using the  
301 identifier: MSV000082561. Peptide identification and quantification was performed using  
302 Proteome Discoverer (Thermo Fisher) with three search engines combined (Sequest HT,  
303 Mascot, and MS Amanda). MS/MS spectra were searched against the human Uniprot database.  
304 Search parameters included: trypsin enzyme specificity with a maximum of 2 missed cleavages  
305 tolerated, False Discovery Rate (FDR) set to 0.01 at both peptide and protein level,  $\pm 10$  ppm  
306 for precursor mass tolerance with a shorter window for fragment mass tolerance for the first  
307 search, and carbamidomethylation of cysteine modification and iTRAQ labels on N-termini and  
308 lysine residues as fixed modifications and oxidation of methionine and N-termini acetylation as  
309 variable modifications. All peptide and protein identifications had scores surpassing the  
310 combined search engine significance threshold for identification. Protein abundance was  
311 calculated as the intensity given from precursor quantification and was then normalized to the  
312 total peptide amount. To correct for total abundance differences between samples, protein and  
313 peptide abundance values in each sample were corrected by a constant factor such that the end  
314 total abundance was equivalent across all samples. Fold change was calculated as the  $\log_2$   
315 difference of average scaled protein abundance in *NORAD* samples and *RMRP* sample. For  
316 statistical analysis, we used the limma package (Smyth, 2004) in R (<https://www.r-project.org/>)  
317 to calculate the adjusted p-value using a moderated *t*-test and Benjamini Hochberg method to  
318 control the FDR.

319

320 **RNA isolation and quantitative reverse transcription PCR (qRT-PCR)**

321 RNA was isolated from cells using the RNeasy Mini Kit (Qiagen), or, for RIP experiments, Trizol  
322 (Invitrogen), and treated with RNase-free DNase (Qiagen). RNA was reverse transcribed with  
323 PrimeScript RT-PCR mix (Clontech), and Power SYBR Green PCR Master Mix (Applied  
324 Biosystems) was used for qPCR. Biological replicates represent independently grown and  
325 processed cells. Technical replicates represent multiple measurements of the same biological  
326 sample. Primer sequences are provided in Supplementary file 1.

327

328 **Generation and *AAVS1* knock-in of *NORAD* constructs**

329 Full-length wild-type *NORAD* was amplified from a modified pcDNA3.1 vector containing the  
330 *NORAD* cDNA (Lee et al., 2016), along with an additional 115 base pairs downstream of the  
331 endogenous *NORAD* polyadenylation site. The PRE-mutant (PREmut) construct containing 18  
332 PRE mutations (TGT to ACA) was synthesized by GENEWIZ. The 5' deletion construct ( $\Delta$ 1-  
333 898), 5' fragment (nt 33-898), and ND4 and were amplified from the full-length *NORAD*  
334 construct using primers provided in Supplementary file 1. Constructs were cloned into an  
335 *AAVS1/PPP1R12C* targeting vector (*AAVS1* hPGK-PuroR-pA donor, Addgene plasmid #22072)  
336 digested with KpnI and MfeI to remove the GFP cassette. These vectors, as well as a control  
337 GFP vector, were then inserted into the *AAVS1* locus of HCT116 CRISPRi cells using a  
338 previously described TALEN pair targeting the *AAVS1/PPP1R12C* locus (Sanjana et al., 2012)  
339 (hAAVS1 1L TALEN, Addgene plasmid #35431; hAAVS1 1R TALEN, Addgene plasmid  
340 #35432). Transfection of these plasmids was performed using FugeneHD (Promega) at a 1:1:8  
341 ratio of L-TALEN:R-TALEN:Donor as previously described (Lee et al., 2016). 48 hours after  
342 transfection, cells were selected with hygromycin (500  $\mu$ g/ml) for at least 10 days prior to  
343 introducing sgRNAs for CRISPRi-mediated knockdown.

344

345 **CRISPRi-mediated knockdown**

346 Single guide RNAs (sgRNAs) targeting a sequence upstream of the endogenous *NORAD*  
347 transcription start site or targeting RBMX were cloned into a pU6-sgRNA EF1a-PuroR-T2A-BFP  
348 vector (Addgene plasmid #60955). sgRNA sequences are provided in Supplementary File 1.  
349 pU6-sgRNA vectors were then packaged into lentivirus by transfecting HEK293T cells using a  
350 4:2:1 ratio of pU6-sgRNA:psPAX2:pMD2.G with FuGENE HD. Medium was changed the next  
351 day. Media containing the virus was collected and filtered at 48 hours and 72 hours after  
352 transfection. Virus was then diluted 1:3 with fresh media and used to transduce HCT116  
353 CRISPRi cell lines overnight in a final polybrene concentration of 8 µg/ml. 48 hours after  
354 transduction, selection with 1 µg/ml puromycin was initiated. For HCT116 CRISPRi cells with  
355 *AAVS1/NORAD* construct insertion and sgRNA expression, cells were grown in 1 µg/ml  
356 puromycin and 500 µg/ml hygromycin.

357

358 **UV crosslinking and RNA immunoprecipitation (RIP)**

359 PUM1, PUM2, and RBMX RIP experiments were performed in HCT116 CRISPRi cells stably  
360 expressing *AAVS1/NORAD* constructs and depleted of endogenous *NORAD* with CRISPRi as  
361 described above.  $20 \times 10^6$  cells were washed in cold PBS and UV crosslinked on ice in a  
362 Spectrolinker XL-1500 (Spectronics) at 254 nm (400 mJ/cm<sup>2</sup>). Cells were then scraped,  
363 centrifuged, snap-frozen in liquid nitrogen, and stored at -80°C. RIP was performed following a  
364 modified eCLIP protocol (Van Nostrand et al., 2016) as follows: Cells were lysed in 1 mL cold  
365 iCLIP lysis buffer (50mM Tris-HCl, 100mM NaCl, 1% NP-40, 0.1% SDS, 0.5% sodium  
366 deoxycholate, 1:200 Protease Inhibitor Cocktail III, RNase inhibitor) for 25 minutes on ice.  
367 Lysed cells were then centrifuged at 14,000 g for 15 min at 4°C and the supernatant was added

368 to pre-washed and antibody-coupled Protein G Dynabeads (Invitrogen). For each RIP, 5  $\mu$ g of  
369 antibody (anti-PUM1, Santa Cruz sc-135049; anti-PUM2, Santa Cruz sc-31535; anti-RBMX Cell  
370 Signaling #14794; Goat IgG control, Santa Cruz sc-2028; Rabbit IgG control Cell Signaling  
371 #2729) was coupled to 3.75 mg of beads at room temperature for 45 min, after which unbound  
372 antibody was removed. Sample and beads were incubated at 4°C overnight. The next day,  
373 beads were washed three times with 900  $\mu$ L cold High Salt Wash Buffer #1 (50mM Tris-HCl, 1M  
374 NaCl, 1mM EDTA, 1% NP-40, 0.1% SDS, 0.5% sodium deoxycholate) and three times with 500  
375  $\mu$ L Wash Buffer #2 (20mM Tris-HCl, 10mM MgCl<sub>2</sub>, 0.2% Tween-20). Beads were then  
376 resuspended in 100  $\mu$ L Wash Buffer #2, and 70  $\mu$ L was used for RNA extraction and the  
377 remainder for western blotting. Proteins were extracted by incubation in Laemmli buffer for 10  
378 min at 70°C. Antibodies used for western blotting were anti-PUM1 (ab92545, Abcam), anti-  
379 PUM2 (ab92390, Abcam), and anti-RBMX (14794, Cell Signaling).

380

### 381 **DNA fluorescence in situ hybridization (DNA FISH)**

382 Aneuploidy in *NORAD* construct rescue experiments was assessed 18 to 21 days after  
383 knockdown of endogenous *NORAD*. DNA FISH was performed as described previously (Kopp  
384 et al., 2019; Lee et al., 2016). Chromosome enumeration probes for chromosome 7 (CHR7-10-  
385 GR) and chromosome 20 (CHR20-10-RE) were purchased from Empire Genomics. Cells were  
386 trypsinized, washed in PBS, and incubated in hypotonic 0.4% KCl solution for 5 minutes at room  
387 temperature. Cells were then fixed in 3:1 methanol:glacial acetic acid and dropped onto slides.  
388 DNA FISH hybridizations were performed by the Veripath Cytogenetics laboratory at UT  
389 Southwestern. Slides were analyzed using an AxioObserver Z1 microscope (Zeiss). For each  
390 sample, 200 nuclei were counted and aneuploidy was defined as a chromosome count that  
391 differed from 2n for at least one of the two tested chromosomes. Samples were prepared and



392 counted in an experimenter-blinded manner. Two independent HCT116 CRISPRi cell lines  
393 stably expressing each *AAVS1* knock-in construct were generated, and each was independently  
394 tested for aneuploidy using this method.

395

## 396 **ACKNOWLEDGEMENTS**

397 We thank Rudolf Jaenisch, Didier Trono, Stanley Qi, Jonathan Weissman, and Feng Zhang for  
398 plasmids; Shinichi Nakagawa for technical assistance with RNA FISH; Sangeeta Patel in the  
399 Veripath Cytogenetics laboratory at UT Southwestern for DNA FISH; and Sungyul Lee, Kathryn  
400 O'Donnell, and members of the Mendell laboratory for helpful discussions and comments on the  
401 manuscript. This work was supported by grants from CPRIT (RP160249 to J.T.M.), NIH  
402 (R35CA197311 to J.T.M.; P30CA142543 to J.T.M.; and P50CA196516 to J.T.M.), and the  
403 Welch Foundation (I-1961-20180324 to J.T.M.). J.T.M. is an investigator of the Howard Hughes  
404 Medical Institute.

405

## 406 **AUTHOR CONTRIBUTIONS**

407 M.M.E., F.K., F.R., A.T., and T.C.C. performed experiments. M.G. performed bioinformatic  
408 analyses. M.M.E. and J.T.M. wrote the manuscript.

409

## 410 **AUTHOR INFORMATION**

411 The authors declare no competing interests. Correspondence and requests for materials should  
412 be addressed to [Joshua.Mendell@UTSouthwestern.edu](mailto:Joshua.Mendell@UTSouthwestern.edu).

413

414

## 415 REFERENCES

- 416 Adamson, B., Smogorzewska, A., Sigoillot, F. D., King, R. W., & Elledge, S. J. (2012). A  
417 genome-wide homologous recombination screen identifies the RNA-binding protein RBMX as a  
418 component of the DNA-damage response. *Nat Cell Biol*, 14(3):318-328. doi:10.1038/ncb2426
- 419 Bohn, J. A., Van Etten, J. L., Schagat, T. L., Bowman, B. M., McEachin, R. C., Freddolino, P. L.,  
420 et al. (2018). Identification of diverse target RNAs that are functionally regulated by human  
421 Pumilio proteins. *Nucleic Acids Res*, 46(1):362-386. doi:10.1093/nar/gkx1120
- 422 Kopp, F., Elguindy, M. M., Yalvac, M. E., Zhang, H., Chen, B., Gillett, F. A., et al. (2019).  
423 PUMILIO hyperactivity drives premature aging of Norad-deficient mice. *Elife*, 8:e42650.  
424 doi:10.7554/eLife.42650
- 425 Lee, S., Kopp, F., Chang, T. C., Sataluri, A., Chen, B., Sivakumar, S., et al. (2016). Noncoding  
426 RNA NORAD Regulates Genomic Stability by Sequestering PUMILIO Proteins. *Cell*, 164(1-  
427 2):69-80. doi:10.1016/j.cell.2015.12.017
- 428 Miller, M. A., & Olivas, W. M. (2011). Roles of Puf proteins in mRNA degradation and  
429 translation. *Wiley Interdiscip Rev RNA*, 2(4):471-492. doi:10.1002/wrna.69
- 430 Mito, M., Kawaguchi, T., Hirose, T., & Nakagawa, S. (2016). Simultaneous multicolor detection  
431 of RNA and proteins using super-resolution microscopy. *Methods*, 98:158-165.  
432 doi:10.1016/j.ymeth.2015.11.007
- 433 Munschauer, M., Nguyen, C. T., Sirokman, K., Hartigan, C. R., Hogstrom, L., Engreitz, J. M., et  
434 al. (2018). The NORAD lncRNA assembles a topoisomerase complex critical for genome  
435 stability. *Nature*, 561(7721):132-136. doi:10.1038/s41586-018-0453-z
- 436 Quenault, T., Lithgow, T., & Traven, A. (2011). PUF proteins: repression, activation and mRNA  
437 localization. *Trends Cell Biol*, 21(2):104-112. doi:10.1016/j.tcb.2010.09.013
- 438 Sanjana, N. E., Cong, L., Zhou, Y., Cunniff, M. M., Feng, G., & Zhang, F. (2012). A transcription  
439 activator-like effector toolbox for genome engineering. *Nat Protoc*, 7(1):171-192.  
440 doi:10.1038/nprot.2011.431
- 441 Smyth, G. K. (2004). Linear models and empirical bayes methods for assessing differential  
442 expression in microarray experiments. *Stat Appl Genet Mol Biol*, 3:Article3. doi:10.2202/1544-  
443 6115.1027
- 444 Tichon, A., Gil, N., Lubelsky, Y., Havkin Solomon, T., Lemze, D., Itzkovitz, S., et al. (2016). A  
445 conserved abundant cytoplasmic long noncoding RNA modulates repression by Pumilio  
446 proteins in human cells. *Nat Commun*, 7:12209. doi:10.1038/ncomms12209
- 447 Van Etten, J., Schagat, T. L., Hrit, J., Weidmann, C. A., Brumbaugh, J., Coon, J. J., et al.  
448 (2012). Human Pumilio proteins recruit multiple deadenylases to efficiently repress messenger  
449 RNAs. *J Biol Chem*, 287(43):36370-36383. doi:10.1074/jbc.M112.373522
- 450 Van Nostrand, E. L., Pratt, G. A., Shishkin, A. A., Gelboin-Burkhart, C., Fang, M. Y.,  
451 Sundararaman, B., et al. (2016). Robust transcriptome-wide discovery of RNA-binding protein

452 binding sites with enhanced CLIP (eCLIP). *Nat Methods*, 13(6):508-514.  
453 doi:10.1038/nmeth.3810  
454

455 **FIGURE LEGENDS**

456 **Figure 1. *NORAD* localizes predominantly to the cytoplasm. (A)** RNA FISH in HCT116 cells  
457 using a panel of 11 probes tiling the entire *NORAD* transcript reveals a predominantly  
458 cytoplasmic signal that is absent in *NORAD*<sup>-/-</sup> cells with all probes except probe 7, which  
459 produces a nonspecific signal likely due to the presence of an Alu repeat element. *NORAD*  
460 FISH signal in red, DAPI counterstain in blue. Locations of PREs indicated by arrowheads.  
461 ND1-ND5 represent repetitive *NORAD* domains, as previously described (Lee et al., 2016). **(B)**  
462 RNA FISH image using probe 3 showing a wider field of cells. **(C)** Subcellular fractionation  
463 followed by qRT-PCR in HCT116 cells using primers located in the 3' or 5' end of *NORAD*,  
464 *GAPDH* (cytoplasmic control), or *NEAT1* (nuclear control). n = 3 biological replicates each with  
465 3 technical replicates.

466

467 **Figure 2. *NORAD* remains predominantly in the cytoplasm after treatment with DNA**  
468 **damaging agents. (A)** RNA FISH in HCT116 cells using the indicated *NORAD* probes following  
469 a 12 hour treatment with doxorubicin or camptothecin. **(B)** *NORAD* RNA FISH (probe 5) after  
470 the indicated drug treatments. Images captured with identical microscope settings. **(C)**  
471 Subcellular fractionation followed by qRT-PCR in HCT116 cells after treatment with  
472 camptothecin for the indicated number of hours. n = 3 biological replicates each with 3 technical  
473 replicates. **(D)** As in (C) except cells were treated with camptothecin plus actinomycin D. n = 3  
474 technical replicates.

475

476 **Figure 3. Generation and stable expression of *NORAD* constructs. (A)** Schematic depicting  
477 wild-type or mutant *NORAD* constructs. *NORAD* sequence conservation in mammals (UCSC  
478 Genome Browser Hg38 PhastCons track) highlights the strong conservation of the region of  
479 *NORAD* harboring PREs (arrowheads). PREmut contains 18 UGU to ACA mutations in PREs

480 (grey arrowheads); 5' deletion (5' del) lacks the RBMX binding site (nt 1-898) (Munschauer et  
481 al., 2018); 5' fragment (5' frag) spans the RBMX binding site (nt 33-898); ND4 construct  
482 represents the most conserved segment of *NORAD* (nt 2494-3156). **(B)** (Upper) Schematic  
483 depicting insertion of constructs into the *AAVS1/PPP1R12C* locus using TALENs. (Lower) qRT-  
484 PCR analysis of expression of each *NORAD* construct in HCT116 CRISPRi cells after infection  
485 with control or endogenous *NORAD*-targeting sgRNAs. Expression was normalized to  
486 endogenous *NORAD* level (represented by expression in *AAVS1*-GFP cells infected with  
487 sgControl). The data in the left graph was generated with a primer pair in ND4 that does not  
488 amplify the 5' fragment, while the right graph used primers at the *NORAD* 5' end. Values  
489 normalized to *GAPDH* expression. n = 3 technical replicates.

490

491 **Figure 4. PUMILIO, but not RBMX, binding to *NORAD* is necessary for genome stability.**

492 **(A)** UV crosslinking and RNA immunoprecipitation (RIP) was used to assess PUM1, PUM2, and  
493 RBMX interactions with GFP mRNA or the indicated *NORAD* constructs. After knock-in of the  
494 indicated constructs to the *AAVS1* locus in HCT116 CRISPRi cells, endogenous *NORAD* was  
495 silenced with a lentivirally-expressed sgRNA. qRT-PCR was used to assess *NORAD* or *GAPDH*  
496 recovery in each RIP sample, expressed as fold-enrichment over pull-down with IgG. The data  
497 in the left graphs were generated with a primer pair in ND4 that does not amplify the 5'  
498 fragment, while the right graphs used primers at the *NORAD* 5' end. n = 2 biological replicates,  
499 each measured with 3 technical replicates. **(B)** Representative RNA FISH images of wild-type or  
500 mutant *NORAD* transcripts expressed from the *AAVS1* locus in HCT116 CRISPRi cells after  
501 knockdown of endogenous *NORAD*. Probe 10 was used for full-length *NORAD*, PREmut, and 5'  
502 del constructs; probe 1 was used for 5' frag; and probe 6 was used for ND4. **(C)** HCT116  
503 CRISPRi cells stably expressing the indicated *AAVS1* knock-in construct were infected with

504 lentivirus expressing control or endogenous *NORAD*-targeting sgRNA. Aneuploidy was assayed  
505 18-21 days later using DNA FISH for chromosome 7 and 20, and the frequency of interphase  
506 cells exhibiting a non-modal (2n) chromosome number was scored. Replicates represent two  
507 independently-derived *AAVS1* knock-in and sgRNA-infected cell lines. \*p < 0.05; \*\*p < 0.01; \*\*\*p  
508 < 0.001; \*\*\*\*p < 0.0001, chi-square test.

509

510 **Figure 5. RBMX is not required for *NORAD* expression or localization. (A)** qRT-PCR  
511 analysis of *RBMX* and *NORAD* transcript levels in HCT116 CRISPRi cells after introduction of  
512 the indicated lentivirally-expressed sgRNA with or without doxorubicin treatment (1  $\mu$ M for 24  
513 hours). Quantification relative to *GAPDH*. n = 3 technical replicates. **(B)** Subcellular fractionation  
514 and qRT-PCR of *NORAD*, *GAPDH* (cytoplasmic control), or *NEAT1* (nuclear control) following  
515 introduction of control or *RBMX*-targeting sgRNAs. n = 3 biological replicates each with 3  
516 technical replicates.

517

#### 518 SUPPLEMENTAL FIGURE LEGENDS

519 **Figure 2 – figure supplement 1. *NORAD* remains predominantly cytoplasmic following**  
520 **doxorubicin-induced DNA damage. (A)** Subcellular fractionation followed by qRT-PCR in  
521 HCT116 cells after treatment with doxorubicin for the indicated number of hours. n = 3 biological  
522 replicates each with 3 technical replicates. **(B)** As in (A) except cells were treated with  
523 doxorubicin plus actinomycin D. n = 3 technical replicates.

524

525 **Figure 3 – figure supplement 1. Reanalysis of *NORAD* RAP-MS data.** Analysis of previously  
526 published *NORAD* RAP-MS data (Munschauer et al., 2018) using a combined 3 search engine  
527 algorithm (MS Amanda, Sequest HT, Mascot) identifies isoforms of PUM1 (green), PUM2 (red),  
528 and RBMX (blue) as significantly enriched *NORAD* interactors. Volcano plot showing the

529 average fold-change compared to control *RMRP* pull-down and significance from two biological  
530 replicates.

531

532 **Figure 4 – figure supplement 1. Representative western blots of PUM1, PUM2, and RBMX**  
533 **in RIP experiments.**

Figure 1

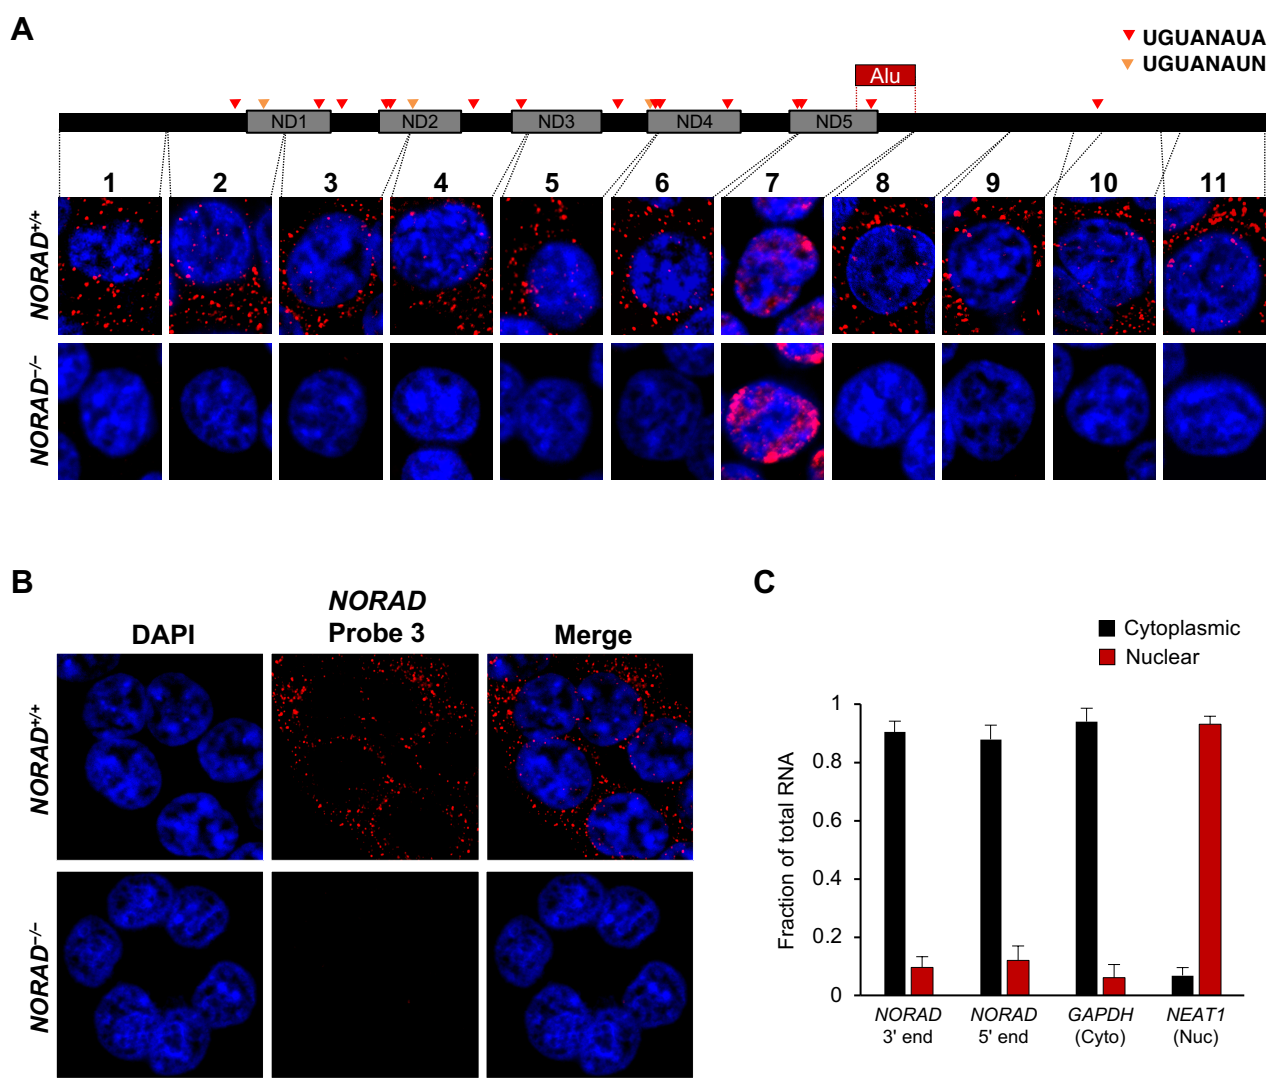



**Figure 2**

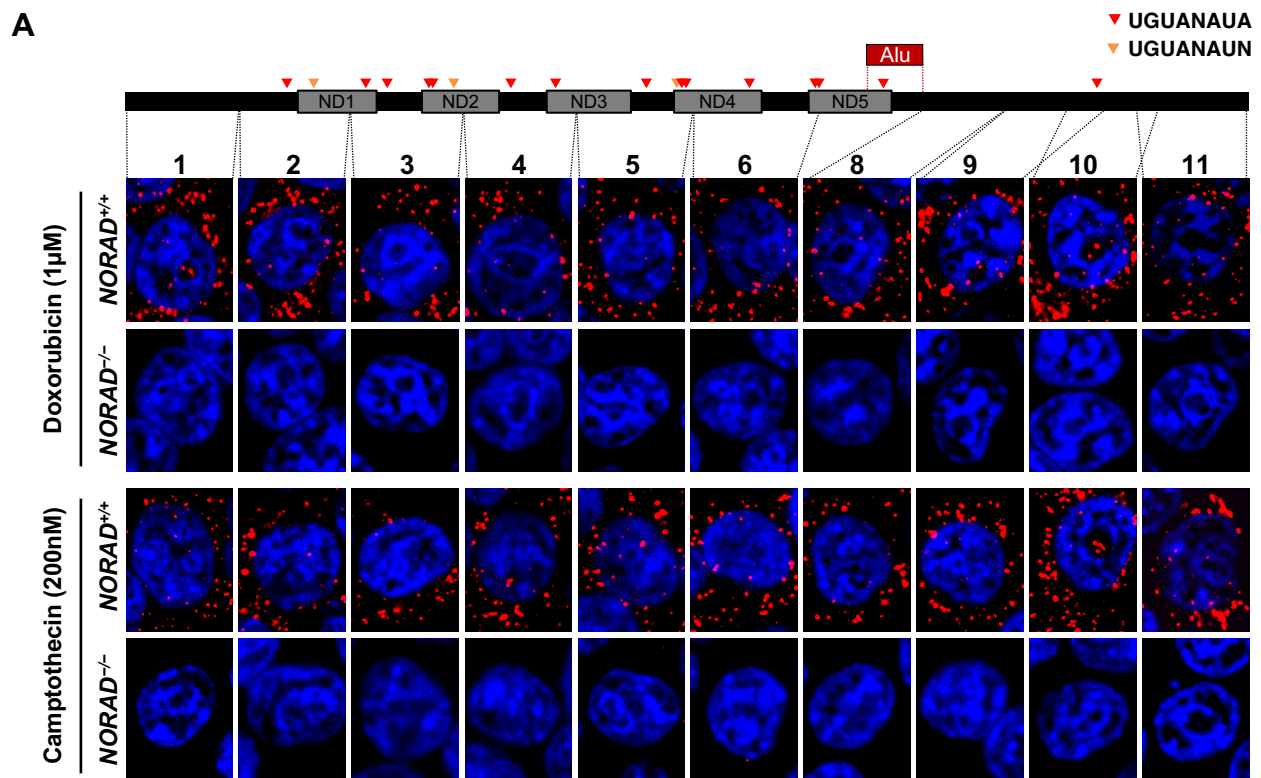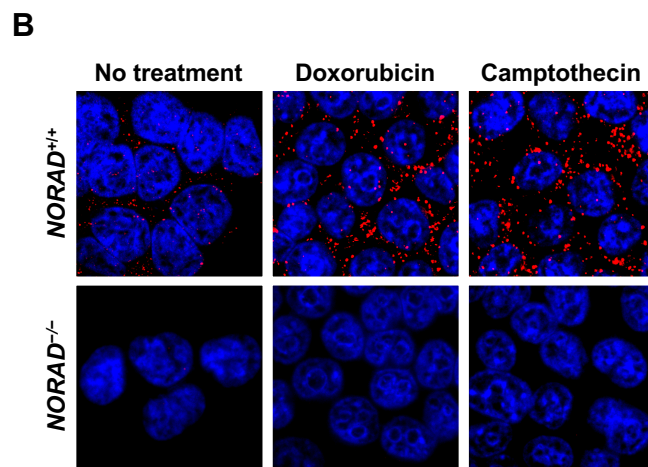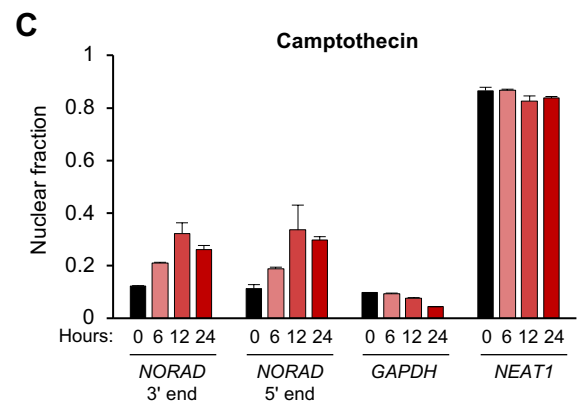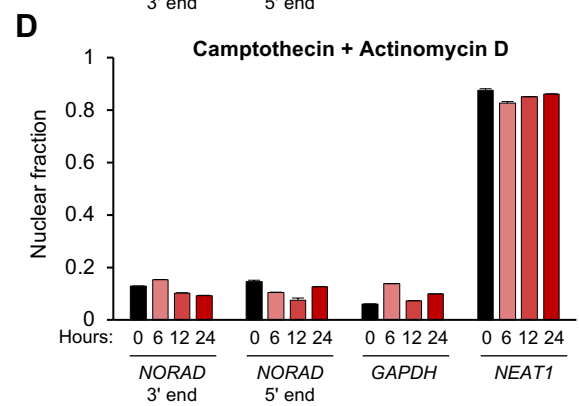

**Figure 3**

**A**

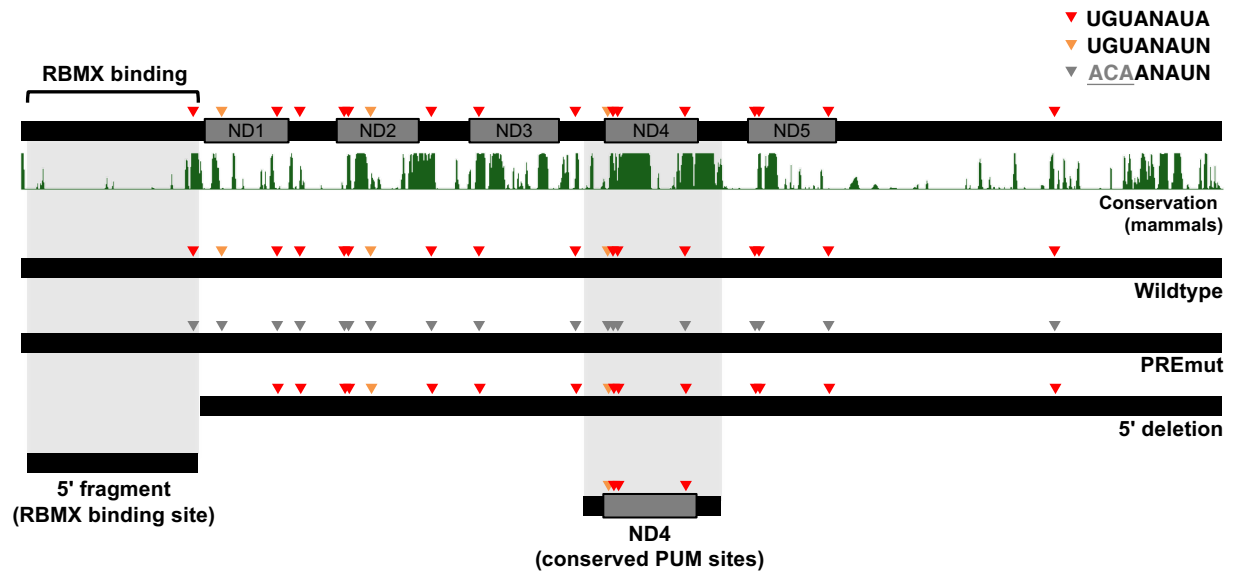

**B**

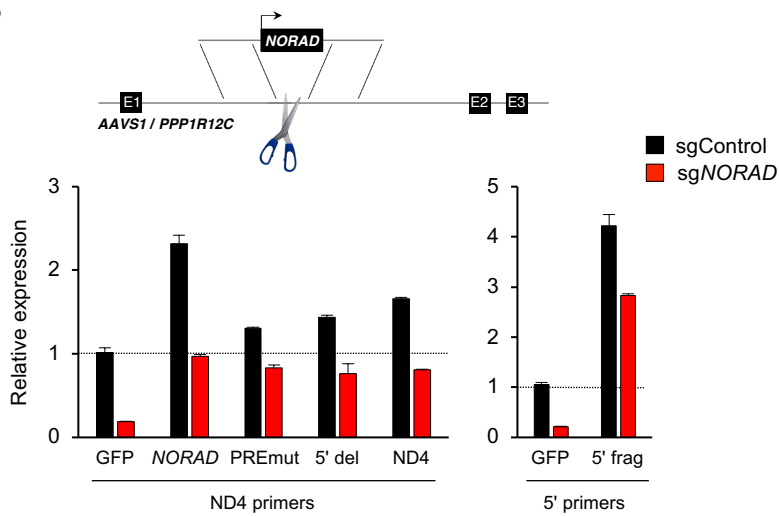

**Figure 4**

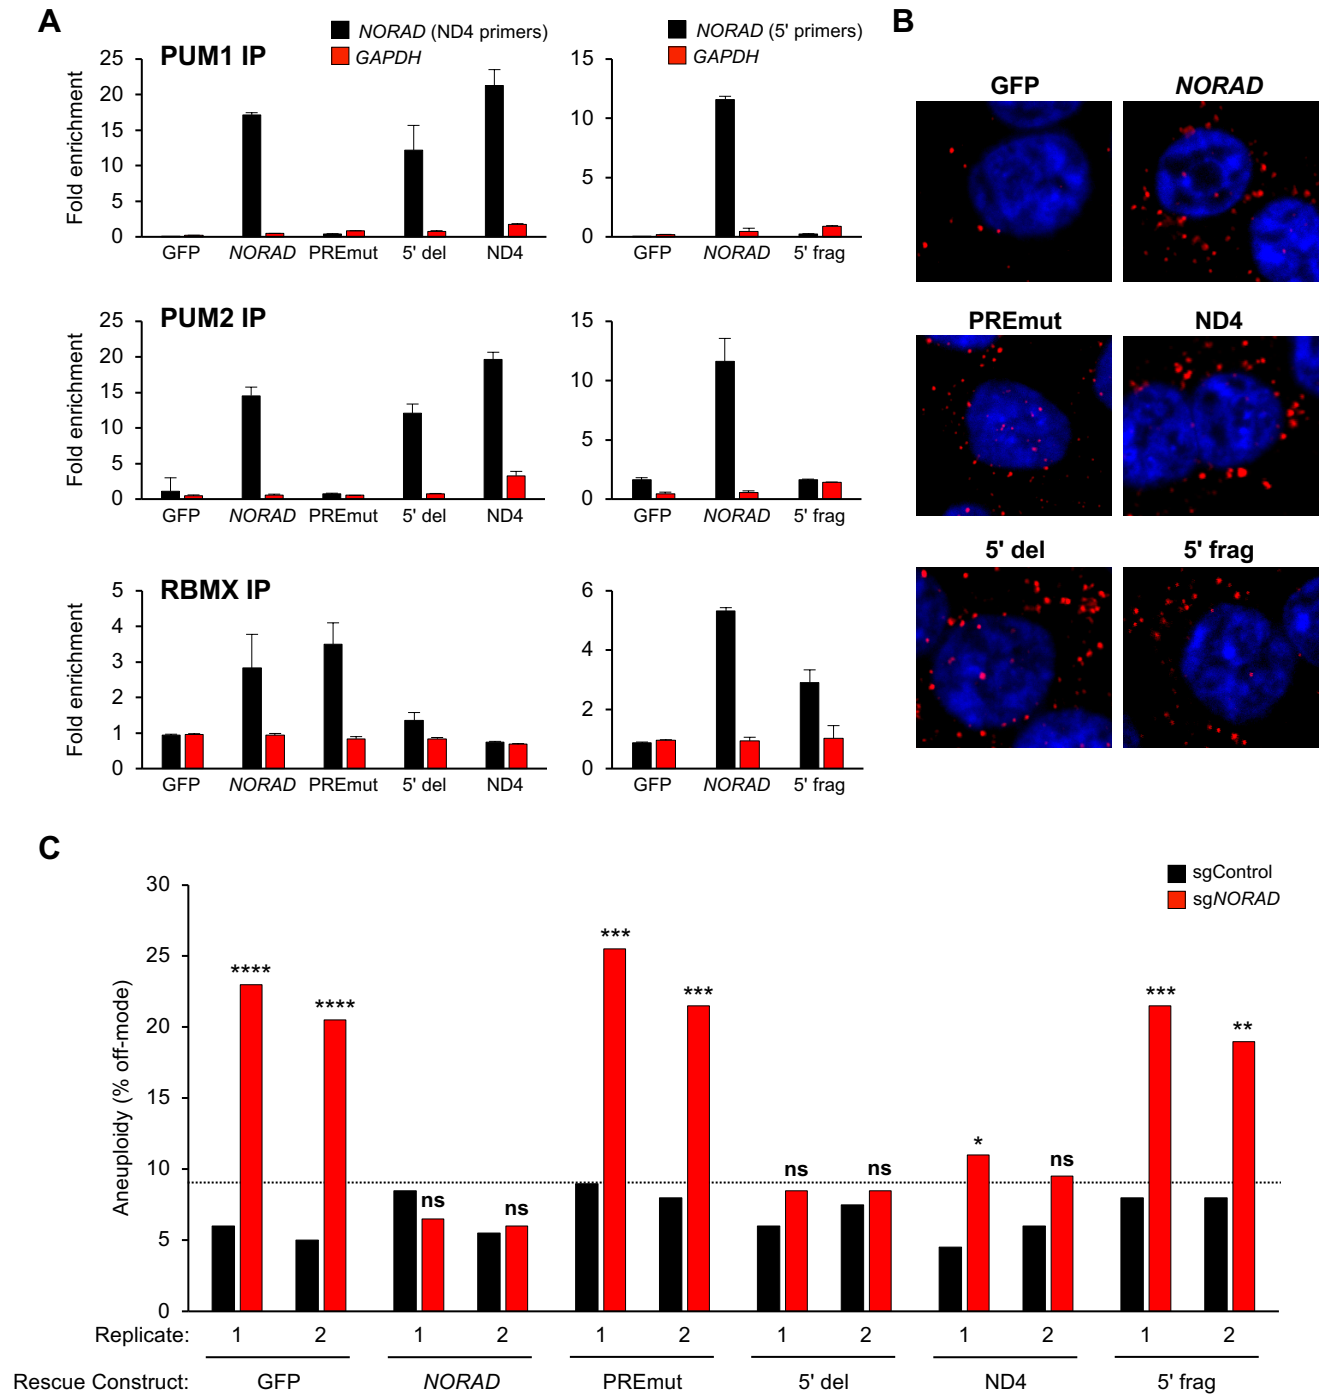

**Figure 5**

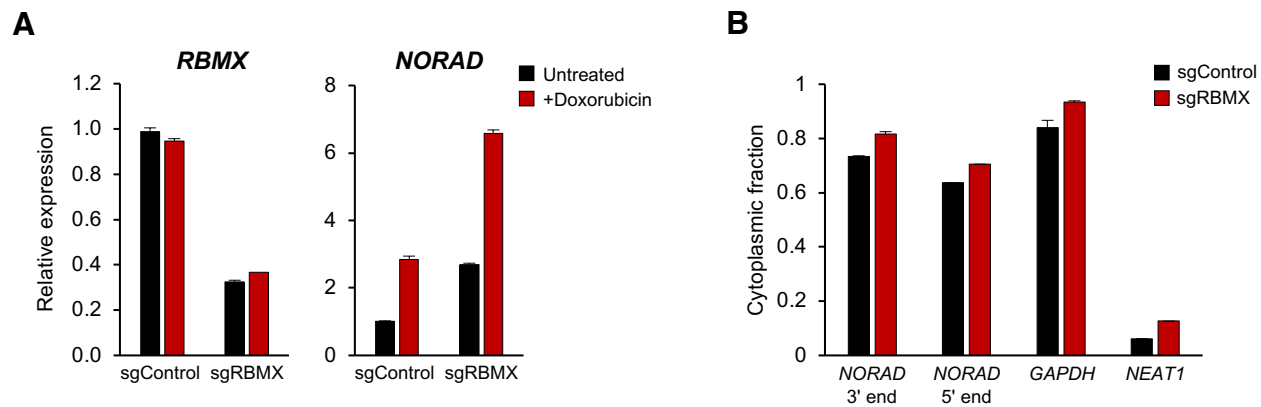

Figure 2 - figure supplement 1

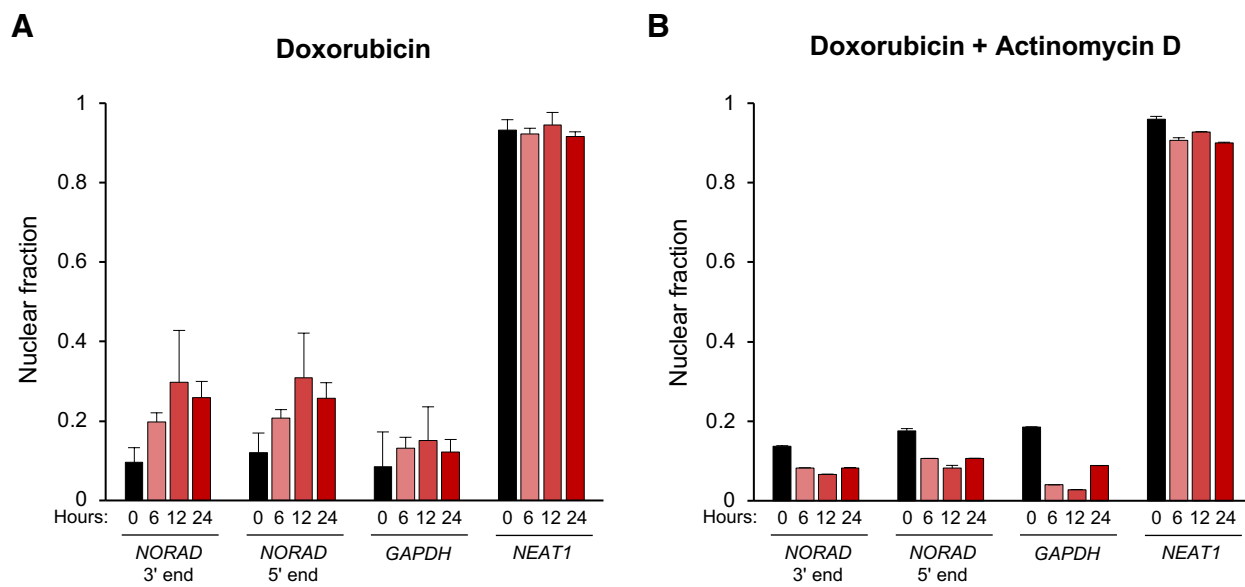

Figure 3 - figure supplement 1

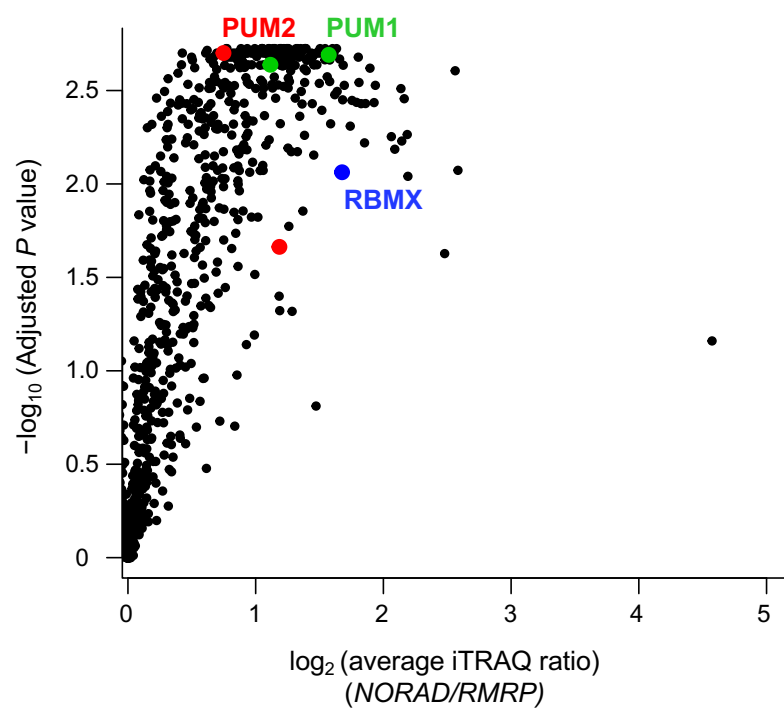

## Figure 4 - figure supplement 1

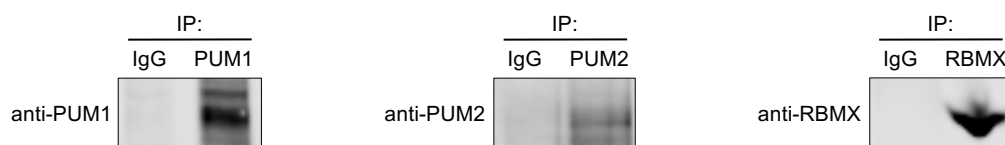

Supplementary Table 1: Oligonucleotides

| Oligonucleotide name/description                                     | Sequence                                                | Notes                                                     |
|----------------------------------------------------------------------|---------------------------------------------------------|-----------------------------------------------------------|
| NORAD FISH probe#1 fwd primer                                        | AGTTCGGTCCGGCAGAGAT                                     |                                                           |
| NORAD FISH probe#1 rev primer (SP6 promoter)                         | <b>gacATTTAGGTGACACTATAGTCGTCAGGACTAGGTAGGTC</b>        | bold represents SP6 promoter                              |
| NORAD FISH probe#2 fwd primer                                        | CAACGGACAAAGGCTTAAGGG                                   |                                                           |
| NORAD FISH probe#2 rev primer (SP6 promoter)                         | <b>gacATTTAGGTGACACTATAGGACCAGTCTAGCATAGAACCTTCTT</b>   | bold represents SP6 promoter                              |
| NORAD FISH probe#3 fwd primer                                        | GGGTAGATGACATGGAGCTGGAA                                 |                                                           |
| NORAD FISH probe#3 rev primer (SP6 promoter)                         | <b>gacATTTAGGTGACACTATAGTTCTGGCCTAGAACCCCTCCCAT</b>     | bold represents SP6 promoter                              |
| NORAD FISH probe#4 fwd primer                                        | GGGTCTAGGCCAGAAATGTTTACA                                |                                                           |
| NORAD FISH probe#4 rev primer (SP6 promoter)                         | <b>gacATTTAGGTGACACTATAGGCTTAGAGATGGTCAACAAATTC</b>     | bold represents SP6 promoter                              |
| NORAD FISH probe#5 fwd primer                                        | CCATCTCTAAGCATTACACGTGCC                                |                                                           |
| NORAD FISH probe#5 rev primer (SP6 promoter)                         | <b>gacATTTAGGTGACACTATAGGTCCTTTTTCAGAAGACAGCCCTTCTA</b> | bold represents SP6 promoter                              |
| NORAD FISH probe#6 fwd primer                                        | GGCTGTCCTTCTGAAAAGGACTTTTG                              |                                                           |
| NORAD FISH probe#6 rev primer (SP6 promoter)                         | <b>gacATTTAGGTGACACTATAGGTAATGCTTAGGGGGGTTTTAAC</b>     | bold represents SP6 promoter                              |
| NORAD FISH probe#7 fwd primer                                        | CAGATGGCTTATAGCTGTCCACG                                 |                                                           |
| NORAD FISH probe#7 rev primer (SP6 promoter)                         | <b>gacATTTAGGTGACACTATAGTTTGAACGGAGCCTCGCTC</b>         | bold represents SP6 promoter                              |
| NORAD FISH probe#8 fwd primer                                        | CCGTTTCAAAAAAAGTGCACAAT                                 |                                                           |
| NORAD FISH probe#8 rev primer (SP6 promoter)                         | <b>gacATTTAGGTGACACTATAGGGTGACTAATAAAGTCACTCCC</b>      | bold represents SP6 promoter                              |
| NORAD FISH probe#9 fwd primer                                        | CCACCCCTTGGAGCTAGACAT                                   |                                                           |
| NORAD FISH probe#9 rev primer (SP6 promoter)                         | <b>gacATTTAGGTGACACTATAGACACACAGCAACAGAATACAGTATG</b>   | bold represents SP6 promoter                              |
| NORAD FISH probe#10 fwd                                              | TGTTTATTAGGTTGGCAGCA                                    |                                                           |
| NORAD FISH probe#10 rev primer (SP6 promoter)                        | <b>gacATTTAGGTGACACTATAGTTCTTCTAGATCCTGTGTAGGC</b>      | bold represents SP6 promoter                              |
| NORAD FISH probe#11 fwd                                              | GAGCATTAAAGGGAATGCAGCAT                                 |                                                           |
| NORAD FISH probe#11 rev primer (SP6 promoter)                        | <b>gacATTTAGGTGACACTATAGCAATGGAGGGAGGAGTCAAAGATG</b>    | bold represents SP6 promoter                              |
| NORAD 5' end qRT-PCR fwd primer                                      | CTCTGCTGTGGCTGCC                                        |                                                           |
| NORAD 5' end qRT-PCR rev primer                                      | GGGTGGGAAAGAGAGGTTTCG                                   |                                                           |
| NORAD 3' end qRT-PCR fwd primer                                      | TGATAGGATACATCTTGGACATGGA                               |                                                           |
| NORAD 3' end qRT-PCR rev primer                                      | TGGACACATCTGCATACATCTCT                                 |                                                           |
| NORAD ND4 qRT-PCR fwd primer                                         | GGAGAGGAGTTGGAAAGGAATG                                  |                                                           |
| NORAD ND4 qRT-PCR rev primer                                         | TGTCGGTATATACACAGTAGG                                   |                                                           |
| GAPDH qRT-PCR fwd primer                                             | AGCCACATCGCTCAGACAC                                     |                                                           |
| GAPDH qRT-PCR rev primer                                             | GCCCAATACGACCAATTC                                      |                                                           |
| NEAT1 qRT-PCR fwd primer                                             | AGGCAGGGAGAGGTAGAAGG                                    |                                                           |
| NEAT1 qRT-PCR rev primer                                             | TGGCATGGACAAGTTGAAGA                                    |                                                           |
| RBMX qRT-PCR fwd primer                                              | CAGTTCGCGAGTAGCAGTGGA                                   |                                                           |
| RBMX qRT-PCR rev primer                                              | TCGAGGTGGACCTCCATAAC                                    |                                                           |
| NORAD full length construct fwd primer (cloning into AAVS1 plasmid)  | ttcgaattctcagtcgacggtaccAGTTCGGTCCGGCAGAGAT             | lower case sequence represents homology for HiFi assembly |
| NORAD full length construct rev primer (cloning into AAVS1 plasmid)  | caataaacaagttacaacaacaattqCAATGGAGGGAGGAGTCAAAA         | lower case sequence represents homology for HiFi assembly |
| NORAD 5' deletion construct fwd primer (cloning into AAVS1 plasmid)  | ttcgaattctcagtcgacggtaccATTCTCATTTGTTAAAAAGA            | lower case sequence represents homology for HiFi assembly |
| NORAD 5' deletion construct rev primer (cloning into AAVS1 plasmid)  | caataaacaagttacaacaacaattqCAATGGAGGGAGGAGTCAAAA         | lower case sequence represents homology for HiFi assembly |
| NORAD 5' fragment construct fwd primer (cloning into AAVS1 plasmid)  | ttcgaattctcagtcgacggtaccCAGAACGCAGCCCGCTCCTC            | lower case sequence represents homology for HiFi assembly |
| NORAD 5' fragment construct rev primer (cloning into AAVS1 plasmid)  | caataaacaagttacaacaacaattqTTACAAGATGTGTAACCTTC          | lower case sequence represents homology for HiFi assembly |
| NORAD ND4 fragment construct fwd primer (cloning into AAVS1 plasmid) | ttcgaattctcagtcgacggtaccAATGCTGTTTGGAAAGTGGAAAT         | lower case sequence represents homology for HiFi assembly |
| NORAD ND4 fragment construct rev primer (cloning into AAVS1 plasmid) | caataaacaagttacaacaacaattqGCACAATATCAAAATGGGTA          | lower case sequence represents homology for HiFi assembly |
| sgRNA NORAD CRISPRi knockdown                                        | GTTCTCTGCGCTGGCAAGAG                                    |                                                           |
| sgRNA RBMX CRISPRi knockdown                                         | GCGCAACGAGGGCGAACAA                                     |                                                           |
